# Supplementary material for: Comparison of hypoglycemic effects of ripened pu-erh tea and raw pu-erh tea in streptozotocin-induced diabetic rats
Source: Royal Society of Chemistry journal article supplement (doi:10.1039/c8ra09259a), 2019-01-01
Supplement: c8ra09259a1.xlsx [file c8ra09259a1.xlsx]

## Sheet: Table S1
Table S1 Relative abandunce of genera in NM, DM, Met and IH groups after the 6-week administration.
ID	Genus	Relative abandunce
		NM-Mean(%)	NM-Sd(%)	DM-Mean(%)	DM-Sd(%)	Met-Mean(%)	Met-Sd(%)	IH-Mean(%)	IH-Sd(%)
1	g__norank_f__Bacteroidales_S24-7_group	12.82	2.581	12.75	4.087	9.531	2.471	13.06	1.979
2	g__Bacteroides	14.95	4.089	8.518	2.562	6.379	3.442	4.603	2.014
3	g__unclassified_f__Lachnospiraceae	3.79	2.129	7.532	5.61	8.355	7.237	7.143	4.065
4	g__Lactobacillus	0.2302	0.1439	0.7457	0.257	5.002	4.37	19.22	13.17
5	g__Lachnospiraceae_NK4A136_group	3.787	1.041	5.136	7.41	2.51	2.208	3.807	2.038
6	g__Desulfovibrio	7.221	4.869	3.265	2.298	1.479	0.9982	2.594	2.651
7	g__Ruminococcus_1	1.888	1.283	1.238	0.4988	7.428	6.477	3.091	1.408
8	g__Prevotellaceae_Ga6A1_group	4.893	5.992	1.451	3.1	5.208	4.317	2.02	2.437
9	g__Prevotellaceae_NK3B31_group	1.779	0.4927	0.6987	0.4765	5.1	2.513	4.957	3.903
10	g__Ruminococcaceae_UCG-005	2.102	1.722	5.747	3.062	1.902	1.876	1.932	1.317
11	g__Alloprevotella	5.213	3.31	0.5628	0.5288	3.359	5.379	2.032	1.972
12	g__Prevotella_1	0.846	0.6632	0.577	0.8257	4.357	6.139	4.505	3.051
13	g__Ruminococcaceae_UCG-014	0.8933	0.477	2.164	1.003	2.627	0.865	4.287	2.444
14	g__Roseburia	0.9296	0.591	6.004	3.786	1.617	1.31	1.274	0.9016
15	g__Ruminiclostridium_9	3.228	0.4613	2.238	1.068	0.7706	0.5133	1.251	1.155
16	g__unclassified_f__Peptostreptococcaceae	0.7488	0.5741	1.098	0.5317	4.499	5.933	0.888	0.1567
17	g__[Eubacterium]_coprostanoligenes_group	1.286	0.4906	1.105	0.6254	2.875	1.987	1.691	0.9207
18	g__Christensenellaceae_R-7_group	2.306	1.846	2.052	1.407	1.692	1.111	0.7122	0.3622
19	g__unclassified_f__Ruminococcaceae	2.539	0.9189	1.554	0.5315	1.1	0.9431	1.222	0.6262
20	g__Prevotellaceae_UCG-001	1.044	0.5977	0.9489	0.7619	2.41	1.672	1.452	0.7497
21	g__norank_f__Erysipelotrichaceae	0.04653	0.03455	0.5996	0.7687	3.701	5.386	1.341	1.121
22	g__Helicobacter	1.098	0.6094	2.77	3.301	0.3133	0.2619	1.481	2.934
23	g__norank_f__Ruminococcaceae	1.633	0.8714	1.253	0.814	0.7236	0.7374	1.529	1.333
24	g__Bifidobacterium	0.06409	0.09609	3.846	3.831	0.01629	0.01896	0.004695	0.005371
25	g__Ruminococcaceae_UCG-010	2.233	0.7941	0.3368	0.3233	0.6482	0.1783	0.4633	0.27
26	g__unclassified_k__norank_d__Bacteria	1.622	0.4657	1.947	0.5991	0.002175	0.004864	0	0
27	g__Oscillibacter	1.229	1.291	1.555	1.478	0.224	0.1612	0.5547	0.5238
28	g__norank_f__Clostridiales_vadinBB60_group	3.068	2.109	0.2214	0.221	0.0901	0.0453	0.1019	0.03442
29	g__Ruminococcaceae_NK4A214_group	0.6572	0.1622	1.211	0.7626	0.7302	0.4243	0.7502	0.3832
30	g__Lachnospiraceae_UCG-010	0.08263	0.1572	1.154	0.3818	0.9115	0.6405	1.127	0.4486
31	g__Clostridium_sensu_stricto_1	0.03354	0.01858	2.51	2.878	0.2269	0.1875	0.1891	0.1011
32	g__Ruminiclostridium_6	0.9182	0.5135	0.6708	0.9222	0.5326	0.6353	0.7893	0.4991
33	g__norank_f__Rhodospirillaceae	1.836	0.7954	0.7343	0.2579	0.194	0.2514	0.1354	0.05309
34	g__norank_f__Lachnospiraceae	1.34	0.7322	0.8007	0.3353	0.2998	0.1724	0.3965	0.1418
35	g__Phascolarctobacterium	0.4777	0.174	0.7903	0.1637	0.9134	0.5588	0.4324	0.1893
36	g__Parasutterella	0.03363	0.02875	1.087	1.054	0.7379	0.6191	0.6257	0.5925
37	g__Allobaculum	0.3459	0.1919	0.8065	0.6772	0.6589	0.5253	0.629	0.1535
38	g__norank_o__Mollicutes_RF9	0.7431	0.4338	0.4655	0.232	0.4298	0.5722	0.6802	0.4803
39	g__Coprococcus_2	0.001844	0.002773	0.5804	0.7172	0.7828	0.8561	0.9276	0.4346
40	g__Blautia	0.1212	0.1339	2.011	2.167	0.08839	0.09913	0.06612	0.03966
41	g__Anaerotruncus	0.6112	0.2055	0.7095	0.1509	0.3033	0.1692	0.3722	0.2859
42	g__Prevotella_9	0	0	0.0005531	0.001237	1.74	2.446	0.006895	0.008328
43	g__Parabacteroides	0.494	0.1143	0.3937	0.08878	0.4213	0.2189	0.3669	0.2386
44	g__Sutterella	0.7641	0.3002	0.4262	0.2678	0.2419	0.1568	0.06627	0.05252
45	g__Alistipes	0.8168	0.3807	0.175	0.124	0.2266	0.1048	0.2439	0.05442
46	g__Coprococcus_1	0.1997	0.08398	0.8438	0.3801	0.1715	0.1235	0.2034	0.08828
47	g__Anaerostipes	0.5235	1.146	0.1325	0.177	0.1704	0.2861	0.5454	0.7198
48	g__[Eubacterium]_xylanophilum_group	0.3542	0.2408	0.3766	0.3397	0.2883	0.1784	0.316	0.1041
49	g__norank_o__Gastranaerophilales	0.7455	0.6436	0.2078	0.05748	0.2883	0.2501	0.08706	0.02371
50	g__Turicibacter	0.03668	0.0385	1.14	1.427	0.0984	0.05312	0.04346	0.02693
51	g__Ruminiclostridium	0.4838	0.3272	0.4415	0.2297	0.07341	0.05032	0.3112	0.3385
52	g__Lachnoclostridium	0.3778	0.1513	0.5046	0.2953	0.07174	0.06712	0.08734	0.05739
53	g__Candidatus_Saccharimonas	0.03045	0.01164	0.3387	0.4446	0.5493	0.8017	0.07268	0.05348
54	g__Ruminococcaceae_UCG-009	0.1908	0.1055	0.1484	0.1035	0.2363	0.1242	0.4078	0.1003
55	g__Elusimicrobium	0.7703	0.2184	0.0776	0.1083	0.09494	0.1122	0.0156	0.01097
56	g__Escherichia-Shigella	0.01117	0.01208	0.1881	0.1571	0.2098	0.1363	0.4829	0.3168
57	g__unclassified_f__Prevotellaceae	0.03384	0.0301	0.01327	0.02968	0.6846	0.5483	0.1292	0.1163
58	g__Ruminococcaceae_UCG-013	0.1443	0.0492	0.0408	0.007418	0.2001	0.05725	0.324	0.06297
59	g__norank_f__Peptococcaceae	0.2342	0.1219	0.1355	0.09776	0.1915	0.1295	0.1192	0.08405
60	g__Klebsiella	0	0	0.01896	0.01881	0.5492	1.182	0.002838	0.004055
61	g__norank_o__Opitutae_vadinHA64	0.05954	0.03455	0.1447	0.1198	0.1565	0.2282	0.1201	0.1718
62	g__Lachnospiraceae_NC2004_group	0.1302	0.08682	0.03929	0.08625	0.1468	0.2305	0.1578	0.05734
63	g__Anaeroplasma	0.4523	0.6481	0.00111	0.002483	0.01052	0.02352	0.004171	0.009327
64	g__Corynebacterium_1	0.002536	0.002867	0.3779	0.5789	0.04656	0.07505	0.01896	0.009687
65	g__Family_XIII_AD3011_group	0.1051	0.03508	0.1093	0.09797	0.1238	0.07043	0.08861	0.05509
66	g__Lachnospira	0.01433	0.03205	0.07442	0.09991	0.2143	0.3972	0.1166	0.1487
67	g__[Ruminococcus]_torques_group	0.009228	0.01433	0.3692	0.3145	0.02731	0.02155	0.01075	0.009976
68	g__Anaerovorax	0.08373	0.02205	0.05466	0.04967	0.1733	0.132	0.09631	0.06681
69	g__Rikenellaceae_RC9_gut_group	0.04338	0.05874	0.05142	0.04747	0.1779	0.1886	0.1175	0.06078
70	g__Papillibacter	0.2065	0.09375	0.04515	0.06879	0.09	0.1651	0.03092	0.03886
71	g__Faecalibaculum	0.009973	0.001558	0.3118	0.4986	0.0191	0.01702	0.005474	0.003961
72	g__Ruminiclostridium_5	0.07175	0.04779	0.07891	0.01909	0.06048	0.04755	0.134	0.09451
73	g__norank_f__vadinBE97	0.2237	0.1163	0.05173	0.05927	0.03136	0.03503	0.01381	0.006104
74	g__Psychrobacter	0.01196	0.01017	0.01031	0.017	0.2323	0.5168	0.01235	0.009808
75	g__Tyzzerella	0.1751	0.1282	0.005062	0.004613	0.04941	0.09598	0.03632	0.05819
76	g__Mucispirillum	0.1432	0.1381	0.01109	0.01083	0.006711	0.01228	0.05496	0.09745
77	g__norank_o__Bacteroidales	0.002066	0.003365	0.008877	0.006269	0.1387	0.1904	0.0503	0.03917
78	g__Peptococcus	0.08447	0.05539	0.03606	0.03895	0.02229	0.01663	0.05349	0.05871
79	g__Lachnospiraceae_UCG-006	0.08068	0.03016	0.04829	0.0196	0.005177	0.005364	0.04669	0.02611
80	g__Ruminococcus_2	0.04111	0.04966	0	0	0.07318	0.06009	0.06445	0.07688
81	g__Butyricimonas	0.08214	0.02323	0.0555	0.02704	0.01932	0.01103	0.02161	0.02524
82	g__[Eubacterium]_nodatum_group	0.03887	0.009516	0.05308	0.04212	0.05567	0.04885	0.02883	0.0144
83	g__Aerosphaera	0	0	0.1106	0.2088	0.03514	0.04024	0.01277	0.01421
84	g__unclassified_p__Proteobacteria	0.07098	0.02099	0.08648	0.03971	0	0	0	0
85	g__unclassified_d__Unclassified	0.06629	0.01719	0.08889	0.03394	0	0	0	0
86	g__unclassified_o__Clostridiales	0.04042	0.02075	0.03705	0.01453	0.008875	0.007362	0.03904	0.01894
87	g__Lachnospiraceae_UCG-001	0.04472	0.03949	0.05204	0.1023	0.01246	0.01443	0.01241	0.01523
88	g__Acetatifactor	0.04654	0.03562	0.03282	0.05158	0.02622	0.03176	0.01112	0.009129
89	g__Candidatus_Stoquefichus	0.02409	0.02153	0.04953	0.03325	0.02158	0.02206	0.0123	0.0153
90	g__unclassified_p__Firmicutes	0.003707	0.004096	0.0005531	0.001237	0.02362	0.02905	0.07957	0.1138
91	g__Acinetobacter	0	0	0.00224	0.002323	0.09384	0.1208	0.008317	0.009694
92	g__Pseudomonas	0.02588	0.03499	0.001695	0.002508	0.0764	0.07583	0	0
93	g__Defluviitaleaceae_UCG-011	0.01597	0.01426	0.00397	0.004823	0.03776	0.0345	0.04032	0.01834
94	g__Aerococcus	0	0	0.06309	0.06863	0.02115	0.01618	0.01105	0.01258
95	g__Enterococcus	0	0	0.03031	0.04719	0.03874	0.03688	0.01893	0.01587
96	g__Ruminiclostridium_1	0.02829	0.01636	0.001736	0.003883	0.02163	0.01343	0.0331	0.03484
97	g__Faecalitalea	0.0471	0.07669	0.03276	0.07324	0.003155	0.007055	0.0008734	0.001953
98	g__Coriobacteriaceae_UCG-002	0	0	0.04664	0.06599	0.01718	0.01114	0.01937	0.01937
99	g__unclassified_o__Bacteroidales	0.001116	0.001535	0.001662	0.001517	0.03264	0.02463	0.04157	0.0329
100	g__Butyricicoccus	0.05547	0.01301	0.0133	0.01832	0.006202	0.01142	0.001747	0.003906
101	g__Barnesiella	0.05339	0.02989	0.001736	0.003883	0.003639	0.005867	0.009084	0.009349
102	g__Atopostipes	0.0263	0.008793	0.001127	0.001544	0.03996	0.08936	0	0
103	g__Erysipelotrichaceae_UCG-004	0.05351	0.04444	0	0	0.003002	0.00463	0.0009841	0.0022
104	g__norank_f__Flavobacteriaceae	0.02677	0.02322	0.002274	0.003114	0.01916	0.02995	0.007433	0.009119
105	g__unclassified_f__Christensenellaceae	0.0067	0.004595	0.02633	0.006855	0.004957	0.005578	0.01716	0.01179
106	g__unclassified_f__Thermoplasmatales_Incertae_Sedis	0.03865	0.01637	0.01616	0.01037	0	0	0	0
107	g__Intestinibacter	0.003387	0.006043	0.0321	0.02238	0.01088	0.009305	0.006025	0.008301
108	g__norank_f__Bacillaceae	0.03467	0.02543	0.0005483	0.001226	0.01578	0.03527	0	0
109	g__Family_XIII_UCG-001	0.008229	0.005682	0.01662	0.01504	0.009787	0.007797	0.01593	0.02606
110	g__[Bacteroides]_pectinophilus_group	0.03666	0.08054	0.0005483	0.001226	0.007353	0.009134	0.005241	0.01172
111	g__Ruminococcaceae_UCG-008	0.004137	0.005957	0.03009	0.03535	0.01123	0.01307	0.004315	0.007102
112	g__Anaerofilum	0.009861	0.005916	0.007199	0.005645	0.01424	0.01422	0.01667	0.02079
113	g__Oscillospira	0	0	0.000558	0.001248	0.04572	0.09975	0	0
114	g__Holdemania	0.004457	0.005049	0.02641	0.0122	0.01193	0.01592	0.002467	0.003416
115	g__Ruminococcaceae_UCG-007	0.01203	0.008684	0.005565	0.006496	0.009313	0.005969	0.01826	0.01594
116	g__Victivallis	0.02489	0.01806	0.006317	0.01112	0.006143	0.007719	0.007401	0.01025
117	g__Facklamia	0.008879	0.004458	0.007936	0.008029	0.02422	0.0344	0.001964	0.002717
118	g__Lachnospiraceae_FCS020_group	0.01316	0.00627	0.01168	0.005854	0.007322	0.006012	0.007549	0.005015
119	g__unclassified_f__Defluviitaleaceae	0.01856	0.01039	0.007352	0.00889	0.005697	0.008234	0.006263	0.008471
120	g__Caproiciproducens	0.01524	0.006993	0.01027	0.01402	0.005222	0.005358	0.006781	0.00511
121	g__Odoribacter	0.02992	0.02334	0.005624	0.004528	0.0009433	0.002109	0	0
122	g__unclassified_f__Erysipelotrichaceae	0.0105	0.01455	0.006135	0.003014	0.007375	0.005423	0.01194	0.008856
123	g__Jeotgalicoccus	0.004068	0.001445	0.0005531	0.001237	0.03103	0.06228	0	0
124	g__Proteus	0	0	0.01838	0.0291	0.009439	0.005648	0.007418	0.01427
125	g__Oligella	0	0	0.01317	0.02057	0.007945	0.008292	0.01183	0.01432
126	g__Succinivibrio	0	0	0.01945	0.03106	0.01318	0.02948	0	0
127	g__Myroides	0	0	0.000558	0.001248	0.02936	0.03826	0.001091	0.002439
128	g__[Eubacterium]_ventriosum_group	0.01583	0.01369	0.009448	0.006366	0.005007	0.008564	0	0
129	g__Brachyspira	0.01617	0.02868	0.004985	0.005322	0.001995	0.002738	0.006545	0.01463
130	g__Bilophila	0.02465	0.01628	0.003422	0.004764	0.001052	0.002352	0	0
131	g__unclassified_o__Rhodospirillales	0	0	0.01781	0.01676	0.006554	0.00687	0.001091	0.002439
132	g__Oxalobacter	0	0	0.01232	0.01404	0.01025	0.01657	0	0
133	g__Erysipelotrichaceae_UCG-003	0.01051	0.008697	0.001127	0.001544	0.001052	0.002352	0.006071	0.004708
134	g__Rikenella	0.003827	0.005746	0	0	0.006947	0.008719	0.007873	0.01127
135	g__norank_f__Coriobacteriaceae	0.009451	0.003918	0.007861	0.005435	0	0	0	0
136	g__Pasteurella	0.007862	0.0132	0.002765	0.006183	0.001995	0.002738	0.001043	0.002332
137	g__Campylobacter	0	0	0.01167	0.0112	0	0	0.0008734	0.001953
138	g__norank_f__Christensenellaceae	0.007389	0.008479	0.000558	0.001248	0.002406	0.00332	0.001043	0.002332
139	g__Adlercreutzia	0.006256	0.008797	0.003977	0.004828	0	0	0.0008734	0.001953
140	g__Paenochrobactrum	0.0005981	0.001337	0.001736	0.003883	0.005236	0.005834	0.003272	0.007317
141	g__unclassified_f__Brucellaceae	0.001837	0.001707	0	0	0.003725	0.005789	0.004649	0.007194
142	g__unclassified_f__Family_XIII	0.002584	0.003652	0.0005531	0.001237	0.002139	0.00293	0.00279	0.004018
143	g__Rothia	0	0	0.003349	0.004539	0	0	0.001043	0.002332
144	g__Hydrogenoanaerobacterium	0.001813	0.001685	0	0	0.002031	0.002793	0	0
